# Supplementary material for: In vivo evaluation of the protective effects of arjunolic acid against lipopolysaccharide-induced septic myocardial injury
Source: PeerJ. 2022 Feb 16;10:e12986. doi: 10.7717/peerj.12986 (PMC8857905; doi:10.7717/peerj.12986)
Supplement: Supplemental Information 1 [file peerj-10-12986-s001.xlsx]

## Sheet: OXIDATIVE STRESS
	SOD	CAT	GPx	MDA	GSH
Control
1	61	40	64.5	6.65	54.2
2	61.7	41	64	6.1	54.4
3	62	40.5	64.3	6.2	54
4	62.4	41.2	64.7	6.4	55
5	60	40.6	65	6.6	55.1
LPS
1	25	14.6	23	36.5	20.7
2	24	14.5	23.7	36	20
3	24.5	14.3	23.1	36.7	20.4
4	24.7	15	24	37	21
5	25.1	15.1	24.1	37.1	20.7
AA+LPS
1	50	31.5	36.7	18.3	40.4
2	40.5	31.7	36.5	18.4	40
3	40.7	31.2	36	18.6	42
4	41	31	36.4	19	41
5	40.3	31.6	36.1	19.1	40.7
AA
1	60	41	62	6.6	52
2	61	41.5	62.4	6.1	52.4
3	61	41.7	62.7	6.4	52.7
4	63	41.9	63	6.8	52.3
5	62	52	63	6.2	52.8

## Sheet: INFLAMMATORY RESPONSE
	IL-1	TNF	IL-4	IL-10	CRP
Control
1	43	41.6	50.5	51	2.38
2	43.5	41	50.4	51.4	2.6
3	43.7	41.2	50.2	51.7	2.4
4	43.2	41.5	50.3	51.2	2.3
5	43.1	42	50.9	51.4	2.8
LPS
1	317	276.6	24	18	61.5
2	317.7	276	24.5	18.3	61.6
3	317.2	276.3	24.7	18.5	61.8
4	317.4	276.8	25	18.2	61.4
5	318	277.1	25.1	18	61.1
AA+LPS
1	146.3	152.5	41	31.8	17.67
2	146.2	152	41.9	31	17.5
3	146.1	152.7	41.8	31.4	17.58
4	146	153	41.2	31.6	17.42
5	146.5	153	41.4	31.9	17.3
AA
1	44	40	50	49.6	2.4
2	44.2	40.5	50.4	49	2.3
3	44.7	40.7	50.9	49.7	2.8
4	44.5	40.2	51	49.3	2.2
5	44	41	51	49.8	2.1

## Sheet: APOPTOTIC FACTORS
	Casp-3	Casp-8	Casp-9
Control
1	10.98	11.7	7.73
2	10.8	11.2	7.7
3	10.4	11.4	7.3
4	10.7	11.7	7.2
5	10.3	11.4	7.4
LPS
1	57	56.6	33.33
2	58	56	33
3	57.3	56.3	33.14
4	57.7	56.4	33.4
5	57.1	56.1	33.7
AA+LPS
1	27	23.78	21.83
2	27.5	23	21.8
3	27.4	23.2	21.6
4	27.1	23.4	21.1
5	27.3	23.3	21.4
6
AA
1	11	11.8	7.23
2	10.3	11.2	7.2
3	10.6	11.3	7.4
4	10.7	11.6	7.3
5	10.4	11.6	7.1
6

## Sheet: Cardiac Markers
	LDH	CK	troponin	CCO
CONTROL
1	114	2.6	0.95	19.55
2	119	4.1	1.08	19.7
3	96	5.3	1.4	19.6
4	95	1.89	1.17	19.66
5	103	4.4	0.89	19.41
LPS
1	314	11.2	3.2	5.9
2	189	18.5	2.4	5.7
3	209	19	2.95	5.75
4	295	16.2	2.2	5.32
5	248	9.8	2.95	5.48
LPS +AA
1	195	7.5	1.95	10.9
2	200	10	2.1	10.8
3	162	6.3	1.73	11
4	154	7.4	1.62	11.1
5	166	6.2	0.98	10.7
AA
1	95	2.7	1.33	19.4
2	96	3.4	0.86	19.7
3	87	1.9	1.14	19.4
4	85	4.2	1.26	19.2
5	97	3.3	0.92	19.11
